# Supplementary material for: Assessment of the Chronic Toxicity and Interactions between Arsenic and Riverbed Biofilms
Source: MDPI journal article supplement (doi:10.3390/ijerph191912689), 2022-10-04
Supplement: s1 [file s1]

## Supplementary material.

**Table S1.** Maximal quantum yield (Ymax, based on Chl-a content), effective quantum yield (Yeff, based on Chl-a content) and photochemical quenching (qP, based on Chl-a content) during biofilm growth in sediments exposed to different As concentrations.

| Ymax     |                        | Day         |             |             |             |             |             |             |
|----------|------------------------|-------------|-------------|-------------|-------------|-------------|-------------|-------------|
| Eguas    |                        | 0           | 9           | 14          | 22          | 28          | 35          | 42          |
|          | 0 mg L <sup>-1</sup>   | 0.02 ± 0.02 | 0.59 ± 0.02 | 0.63 ± 0.00 | 0.50 ± 0.06 | 0.50 ± 0.06 | 0.49 ± 0.08 | 0.49 ± 0.18 |
|          | 0.3 mg L <sup>-1</sup> | 0.02 ± 0.02 | 0.57 ± 0.05 | 0.59 ± 0.09 | 0.51 ± 0.05 | 0.55 ± 0.10 | 0.51 ± 0.12 | 0.44 ± 0.21 |
|          | 1 mg L <sup>-1</sup>   | 0.01 ± 0.02 | 0.61 ± 0.02 | 0.64 ± 0.01 | 0.48 ± 0.12 | 0.49 ± 0.19 | 0.49 ± 0.14 | 0.43 ± 0.13 |
|          | 3 mg L <sup>-1</sup>   | 0.04 ± 0.04 | 0.59 ± 0.05 | 0.61 ± 0.01 | 0.50 ± 0.06 | 0.49 ± 0.10 | 0.48 ± 0.08 | 0.47 ± 0.09 |
|          | 10 mg L                | -           | 0.59 ± 0.04 | 0.61 ± 0.03 | 0.51 ± 0.04 | 0.43 ± 0.08 | 0.31 ± 0.08 | 0.44 ± 0.14 |
|          | 30 mg L <sup>-1</sup>  | 0.05 ± 0.05 | 0.50 ± 0.04 | 0.61 ± 0.01 | 0.51 ± 0.03 | 0.42 ± 0.01 | 0.36 ± 0.11 | 0.47 ± 0.08 |
| Xavarido |                        | 0           | 9           | 14          | 22          | 28          | 35          | 42          |
|          | 0 mg L <sup>-1</sup>   | 0.12 ± 0.03 | 0.65 ± 0.01 | 0.62 ± 0.02 | 0.62 ± 0.01 | 0.60 ± 0.02 | 0.59 ± 0.03 | 0.52 ± 0.05 |
|          | 0.3 mg L <sup>-1</sup> | 0.13 ± 0.05 | 0.63 ± 0.02 | 0.60 ± 0.03 | 0.57 ± 0.03 | 0.55 ± 0.03 | 0.53 ± 0.05 | 0.54 ± 0.05 |
|          | 1 mg L <sup>-1</sup>   | 0.09 ± 0.02 | 0.64 ± 0.01 | 0.54 ± 0.07 | 0.46 ± 0.14 | 0.46 ± 0.07 | 0.48 ± 0.02 | 0.49 ± 0.07 |
|          | 3 mg L <sup>-1</sup>   | 0.12 ± 0.03 | 0.62 ± 0.02 | 0.56 ± 0.03 | 0.48 ± 0.03 | 0.47 ± 0.07 | 0.48 ± 0.02 | 0.50 ± 0.01 |
|          | 10 mg L                | 0.09 ± 0.01 | 0.58 ± 0.02 | 0.61 ± 0.07 | 0.52 ± 0.04 | 0.49 ± 0.05 | 0.52 ± 0.07 | 0.53 ± 0.05 |
|          | 30 mg L <sup>-1</sup>  | 0.12 ± 0.07 | 0.53 ± 0.04 | 0.56 ± 0.11 | 0.49 ± 0.01 | 0.49 ± 0.09 | 0.46 ± 0.08 | 0.44 ± 0.03 |
| Yeff     |                        |             |             |             |             |             |             |             |
| Eguas    |                        | 0           | 9           | 14          | 22          | 28          | 35          | 42          |
|          | 0 mg L <sup>-1</sup>   | 0.17 ± 0.06 | 0.54 ± 0.06 | 0.57 ± 0.01 | 0.42 ± 0.05 | 0.45 ± 0.02 | 0.59 ± 0.01 | 0.58 ± 0.01 |
|          | 0.3 mg L <sup>-1</sup> | 0.04 ± 0.01 | 0.55 ± 0.04 | 0.59 ± 0.06 | 0.45 ± 0.07 | 0.35 ± 0.21 | 0.42 ± 0.20 | 0.39 ± 0.18 |
|          | 1 mg L <sup>-1</sup>   | 0.10 ± 0.07 | 0.53 ± 0.04 | 0.58 ± 0.00 | 0.51 ± 0.07 | 0.59 ± 0.03 | 0.57 ± 0.02 | 0.59 ± 0.01 |
|          | 3 mg L <sup>-1</sup>   | 0.06 ± 0.02 | 0.54 ± 0.03 | 0.58 ± 0.01 | 0.48 ± 0.05 | 0.41 ± 0.16 | 0.26 ± 0.29 | 0.50 ± 0.05 |
|          | 10 mg L                | -           | 0.43 ± 0.03 | 0.56 ± 0.02 | 0.49 ± 0.06 | 0.59 ± 0.00 | 0.51 ± 0.00 | 0.51 ± 0.02 |
|          | 30 mg L <sup>-1</sup>  | 0.03 ± 0.01 | 0.39 ± 0.05 | 0.40 ± 0.09 | 0.38 ± 0.24 | 0.42 ± 0.17 | 0.41 ± 0.04 | 0.55 ± 0.02 |
| Xavarido |                        | 0           | 9           | 14          | 22          | 28          | 35          | 42          |
|          | 0 mg L <sup>-1</sup>   | 0.06 ± 0.06 | 0.48 ± 0.07 | 0.41 ± 0.02 | 0.50 ± 0.03 | 0.45 ± 0.06 | 0.52 ± 0.03 | 0.49 ± 0.03 |

|          |                        |             |            |            |            |            |            |            |
|----------|------------------------|-------------|------------|------------|------------|------------|------------|------------|
|          | 0.3 mg L <sup>-1</sup> | 0.12 ±0.00  | 0.51 ±0.02 | 0.41 ±0.18 | 0.53 ±0.09 | 0.48 ±0.02 | 0.50 ±0.02 | 0.46 ±0.08 |
|          | 1 mg L <sup>-1</sup>   | 0.08 ±0.09  | 0.57 ±0.04 | 0.30 ±0.26 | 0.21 ±0.15 | 0.33 ±0.28 | 0.35 ±0.15 | 0.39 ±0.08 |
|          | 3 mg L <sup>-1</sup>   | 0.03 ±0.05  | 0.53 ±0.05 | 0.30 ±0.08 | 0.34 ±0.19 | 0.27 ±0.05 | 0.34 ±0.11 | 0.43 ±0.11 |
|          | 10 mg L                | 0.04 ±0.01  | 0.47 ±0.02 | 0.35 ±0.30 | 0.34 ±0.11 | 0.47 ±0.04 | 0.46 ±0.08 | 0.46 ±0.03 |
|          | 30 mg L <sup>-1</sup>  | 0.16 ±0.17  | 0.47 ±0.15 | 0.30 ±0.33 | 0.26 ±0.37 | 0.26 ±0.36 | 0.25 ±0.35 | 0.39 ±0.01 |
| qP       |                        |             |            |            |            |            |            |            |
| Eguas    |                        | 0           | 9          | 14         | 22         | 28         | 35         | 42         |
|          | 0 mg L <sup>-1</sup>   | 0.62 ±0.48  | 0.90 ±0.03 | 0.93 ±0.03 | 0.83 ±0.02 | 0.72 ±0.13 | 0.93 ±0.03 | 0.94 ±0.01 |
|          | 0.3 mg L <sup>-1</sup> | 0.32 ±0.23  | 0.94 ±0.04 | 0.96 ±0.05 | 0.84 ±0.08 | 0.75 ±0.19 | 0.79 ±0.15 | 0.86 ±0.12 |
|          | 1 mg L <sup>-1</sup>   | -1.31 ±3.63 | 0.88 ±0.04 | 0.94 ±0.02 | 0.66 ±0.49 | 1.00 ±0.11 | 0.77 ±0.24 | 0.96 ±0.05 |
|          | 3 mg L <sup>-1</sup>   | 0.07 ±0.64  | 0.92 ±0.09 | 0.95 ±0.01 | 0.75 ±0.13 | 0.86 ±0.07 | 0.44 ±0.41 | 0.93 ±0.03 |
|          | 10 mg L                | -0.74 ±0.77 | 0.88 ±0.04 | 0.96 ±0.07 | 0.87 ±0.03 | 0.32 ±0.53 | 0.61 ±0.54 | 0.92 ±0.04 |
|          | 30 mg L <sup>-1</sup>  | -0.05 ±0.64 | 0.99 ±0.07 | 0.90 ±0.05 | 0.60 ±0.31 | 0.83 ±0.12 | 0.71 ±0.09 | 0.91 ±0.06 |
| Xavarido |                        | 0           | 9          | 14         | 22         | 28         | 35         | 42         |
|          | 0 mg L <sup>-1</sup>   | 0.82 ±0.98  | 0.84 ±0.07 | 0.54 ±0.40 | 0.84 ±0.08 | 0.84 ±0.06 | 0.87 ±0.06 | 0.85 ±0.02 |
|          | 0.3 mg L <sup>-1</sup> | 6.56 ±9.56  | 0.86 ±0.10 | 0.73 ±0.15 | 0.85 ±0.07 | 0.74 ±0.12 | 0.88 ±0.01 | 0.78 ±0.14 |
|          | 1 mg L <sup>-1</sup>   | 0.83 ±0.61  | 0.89 ±0.06 | 0.52 ±0.44 | 0.52 ±0.32 | 0.57 ±0.49 | 0.79 ±0.21 | 0.75 ±0.11 |
|          | 3 mg L <sup>-1</sup>   | 3.75 ±2.17  | 0.87 ±0.06 | 0.62 ±0.10 | 0.68 ±0.17 | 0.65 ±0.10 | 0.72 ±0.07 | 0.81 ±0.15 |
|          | 10 mg L                | 0.69 ±0.27  | 0.80 ±0.05 | 0.85 ±0.08 | 0.65 ±0.09 | 0.81 ±0.10 | 0.82 ±0.06 | 0.85 ±0.01 |
|          | 30 mg L <sup>-1</sup>  | 3.40 ±3.38  | 0.91 ±0.09 | 0.99 ±0.09 | 0.29 ±0.49 | 0.63 ±0.55 | 0.53 ±0.46 | 0.80 ±0.01 |

**Table S2.** Biofilm algae distribution (%) for the different Arsenic concentrations B1: blue algae, Gr: green algae and Br: brown algae.

| <b>Eguas</b>    | <b>DAY 0</b> |      |      | <b>DAY 4</b> |      |      | <b>DAY 9</b> |     |      | <b>DAY 14</b> |     |      | <b>DAY 22</b> |     |      | <b>DAY 28</b> |      |      | <b>DAY 35</b> |      |      | <b>DAY 42</b> |      |      |
|-----------------|--------------|------|------|--------------|------|------|--------------|-----|------|---------------|-----|------|---------------|-----|------|---------------|------|------|---------------|------|------|---------------|------|------|
| As mg/L         | Bl           | Gr   | Br   | Bl           | Gr   | Br   | Bl           | Gr  | Br   | Bl            | Gr  | Br   | Bl            | Gr  | Br   | Bl            | Gr   | Br   | Bl            | Gr   | Br   | Bl            | Gr   | Br   |
| 0               | 3.5          | 12.7 | 83.8 | 19.2         | 15.6 | 65.2 | 58.8         | 0.7 | 40.5 | 77.2          | 0.1 | 22.6 | 57.1          | 0.9 | 42.0 | 46.7          | 6.2  | 47.0 | 35.7          | 15.8 | 48.5 | 65.6          | 1.0  | 33.4 |
| 0,3             | 0.0          | 10.4 | 89.6 | 27.8         | 15.0 | 57.1 | 56.4         | 1.2 | 42.3 | 66.3          | 2.0 | 31.7 | 59.9          | 5.7 | 34.4 | 37.6          | 19.2 | 43.1 | 33.3          | 17.6 | 49.1 | 44.4          | 7.4  | 48.2 |
| 1               | 0.0          | 17.3 | 82.7 | 35.0         | 9.0  | 56.0 | 71.1         | 0.4 | 28.5 | 58.1          | 0.9 | 41.0 | 52.9          | 4.5 | 42.6 | 47.5          | 2.3  | 50.2 | 42.4          | 5.9  | 51.8 | 53.5          | 5.5  | 41.0 |
| 3               | 0.0          | 23.4 | 76.6 | 31.7         | 5.0  | 63.4 | 54.4         | 0.0 | 45.6 | 62.5          | 1.8 | 35.7 | 51.1          | 2.9 | 46.0 | 34.7          | 8.6  | 56.8 | 32.2          | 16.8 | 51.0 | 36.4          | 8.5  | 55.1 |
| 10              | 0.0          | 20.2 | 79.8 | 33.7         | 10.8 | 55.6 | 60.9         | 0.7 | 38.4 | 62.3          | 0.5 | 37.2 | 63.2          | 1.0 | 35.8 | 44.4          | 3.1  | 52.4 | 31.8          | 2.4  | 65.8 | 47.4          | 0.5  | 52.2 |
| 30              | 0.0          | 18.9 | 81.1 | 24.0         | 30.0 | 46.0 | 54.6         | 7.4 | 38.0 | 49.1          | 0.4 | 50.6 | 55.0          | 0.4 | 44.7 | 33.0          | 11.0 | 56.0 | 28.3          | 10.7 | 61.0 | 36.2          | 16.6 | 47.1 |
| <b>Xavarido</b> | <b>DAY 0</b> |      |      | <b>DAY 4</b> |      |      | <b>DAY 9</b> |     |      | <b>DAY 14</b> |     |      | <b>DAY 22</b> |     |      | <b>DAY 28</b> |      |      | <b>DAY 35</b> |      |      | <b>DAY 42</b> |      |      |
| As mg/L         | Bl           | Gr   | Br   | Bl           | Gr   | Br   | Bl           | Gr  | Br   | Bl            | Gr  | Br   | Bl            | Gr  | Br   | Bl            | Gr   | Br   | Bl            | Gr   | Br   | Bl            | Gr   | Br   |
| 0               | 32.6         | 10.1 | 57.3 | 38.7         | 10.0 | 51.3 | 27.0         | 0.0 | 73.0 | 28.3          | 0.0 | 71.7 | 33.4          | 0.0 | 66.6 | 34.9          | 0.9  | 64.2 | 45.5          | 9.0  | 45.5 | 74.8          | 0.0  | 25.2 |
| 0,3             | 28.0         | 12.7 | 59.3 | 37.7         | 3.7  | 58.6 | 30.8         | 0.0 | 69.2 | 25.0          | 3.6 | 71.4 | 28.3          | 6.7 | 65.0 | 33.8          | 10.9 | 55.2 | 42.7          | 5.0  | 52.3 | 53.9          | 3.0  | 43.1 |
| 1               | 27.7         | 16.5 | 55.7 | 37.3         | 7.8  | 54.9 | 27.3         | 0.0 | 72.7 | 22.9          | 1.3 | 75.8 | 25.9          | 0.9 | 73.2 | 28.7          | 2.6  | 68.7 | 42.2          | 7.6  | 50.2 | 52.0          | 0.0  | 48.0 |
| 3               | 23.9         | 20.5 | 55.7 | 36.5         | 6.7  | 56.8 | 32.2         | 0.0 | 67.8 | 22.5          | 1.7 | 75.9 | 25.4          | 5.5 | 69.1 | 28.2          | 12.7 | 59.1 | 37.2          | 12.3 | 50.5 | 48.5          | 0.8  | 50.7 |
| 10              | 24.7         | 23.7 | 51.6 | 43.1         | 10.1 | 46.8 | 34.9         | 0.0 | 65.1 | 22.3          | 0.0 | 77.7 | 25.0          | 2.3 | 72.7 | 27.3          | 5.7  | 67.0 | 31.8          | 10.8 | 57.4 | 50.0          | 1.5  | 48.5 |
| 30              | 25.1         | 24.3 | 50.6 | 40.6         | 8.5  | 50.8 | 35.1         | 0.0 | 64.9 | 23.4          | 0.1 | 76.5 | 22.3          | 5.4 | 72.2 | 25.9          | 6.1  | 68.0 | 29.1          | 5.3  | 65.5 | 42.4          | 0.3  | 57.3 |
